# Supplementary material for: Dysregulated Mechanotransduction via CCNB2 Underlies Fibroblast Hypoplasia in Developmental Dysplasia of the Hip
Source: Research Square preprint supplement (doi:10.21203/rs.3.rs-6367897/v1), 2025-05-07
Supplement: Supplementary file 1 [file 4b775245663a418bca2157c2.docx]

**Supplementary material**


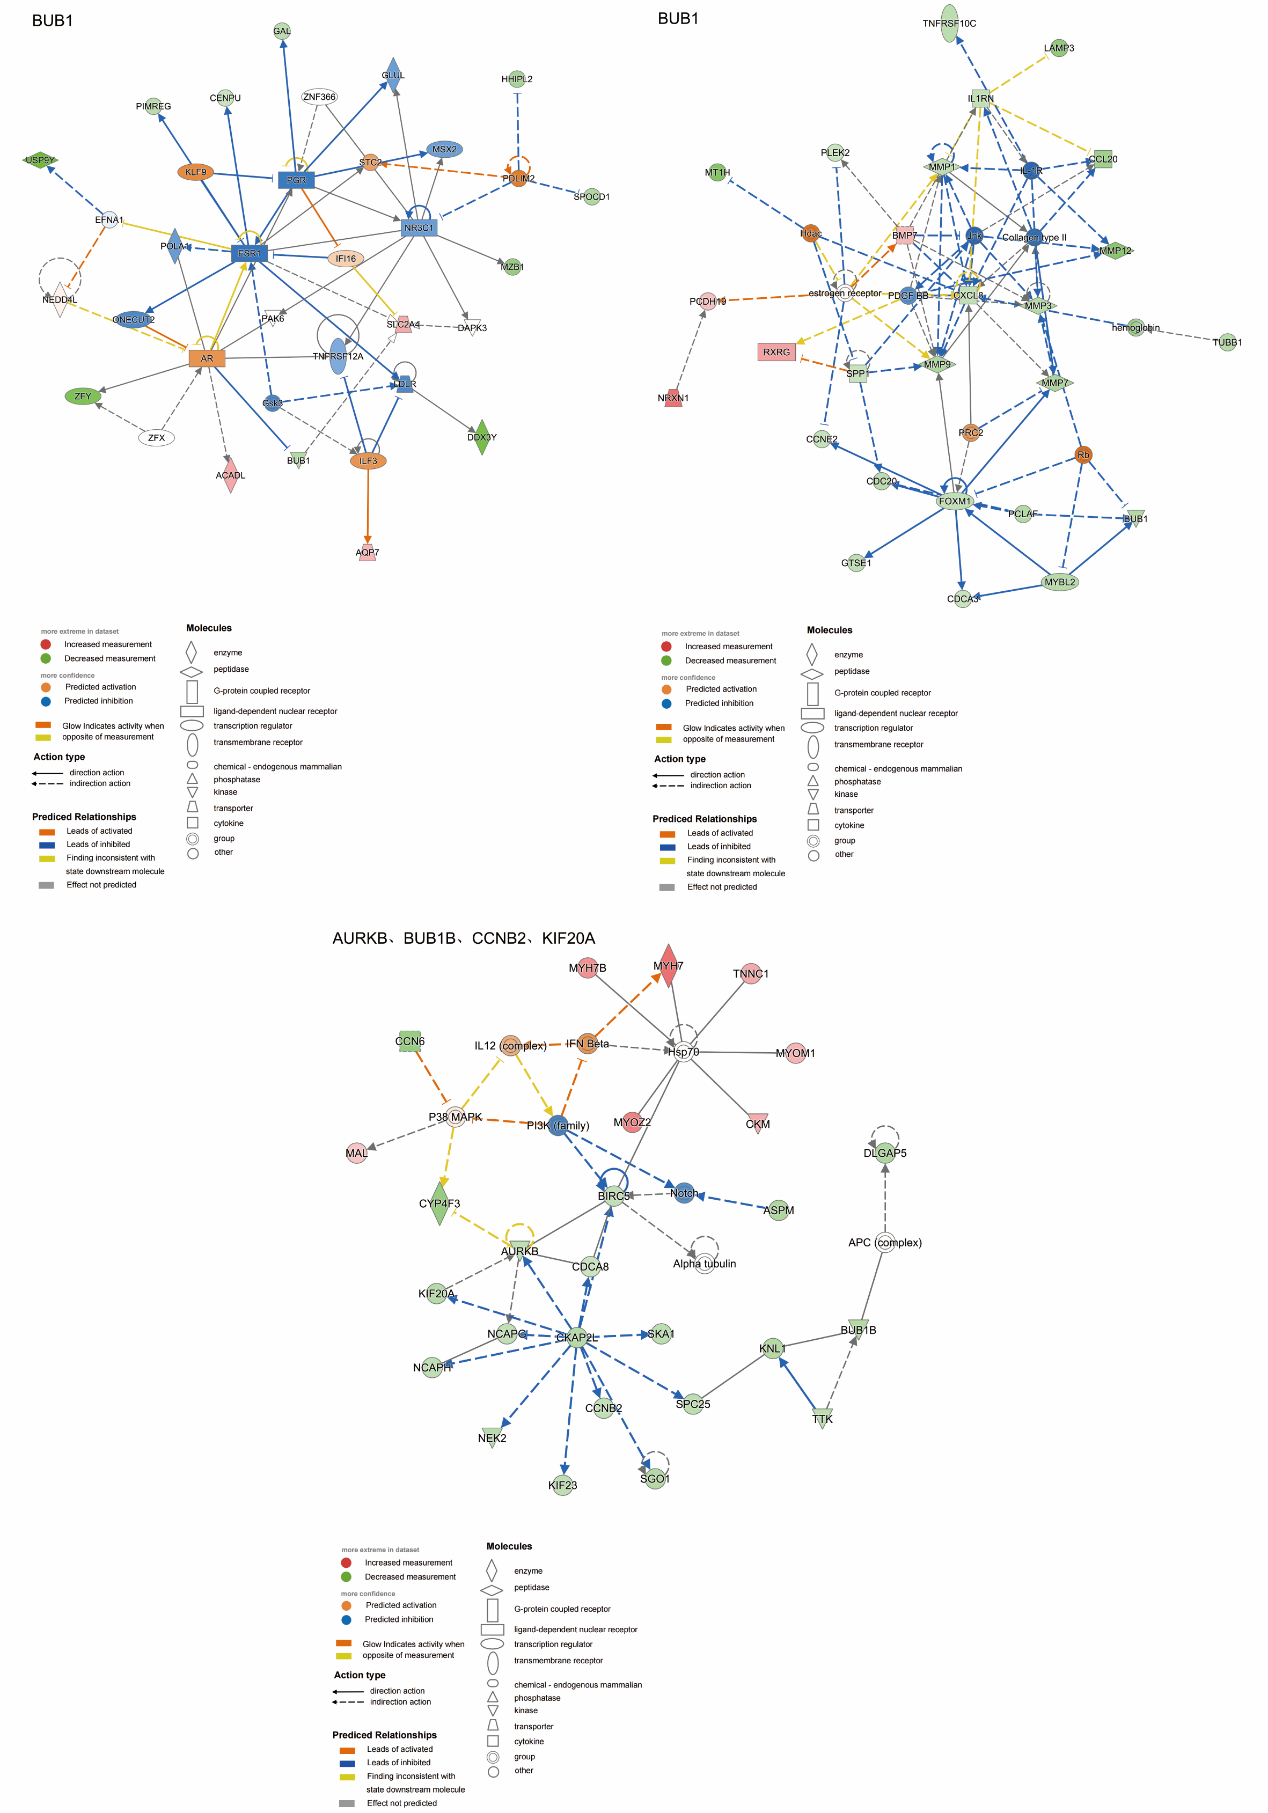


Supplementary Figure 1: Illustrated the complex regulatory relationships of biomarkers.
